# Supplementary material
Source: PubMed Central journal article supplement (PMC4656759)
Supplement: ajtr0007-1812-f8.pdf [file ajtr0007-1812-f8.pdf]

# Immunosuppression of AAL by mincle

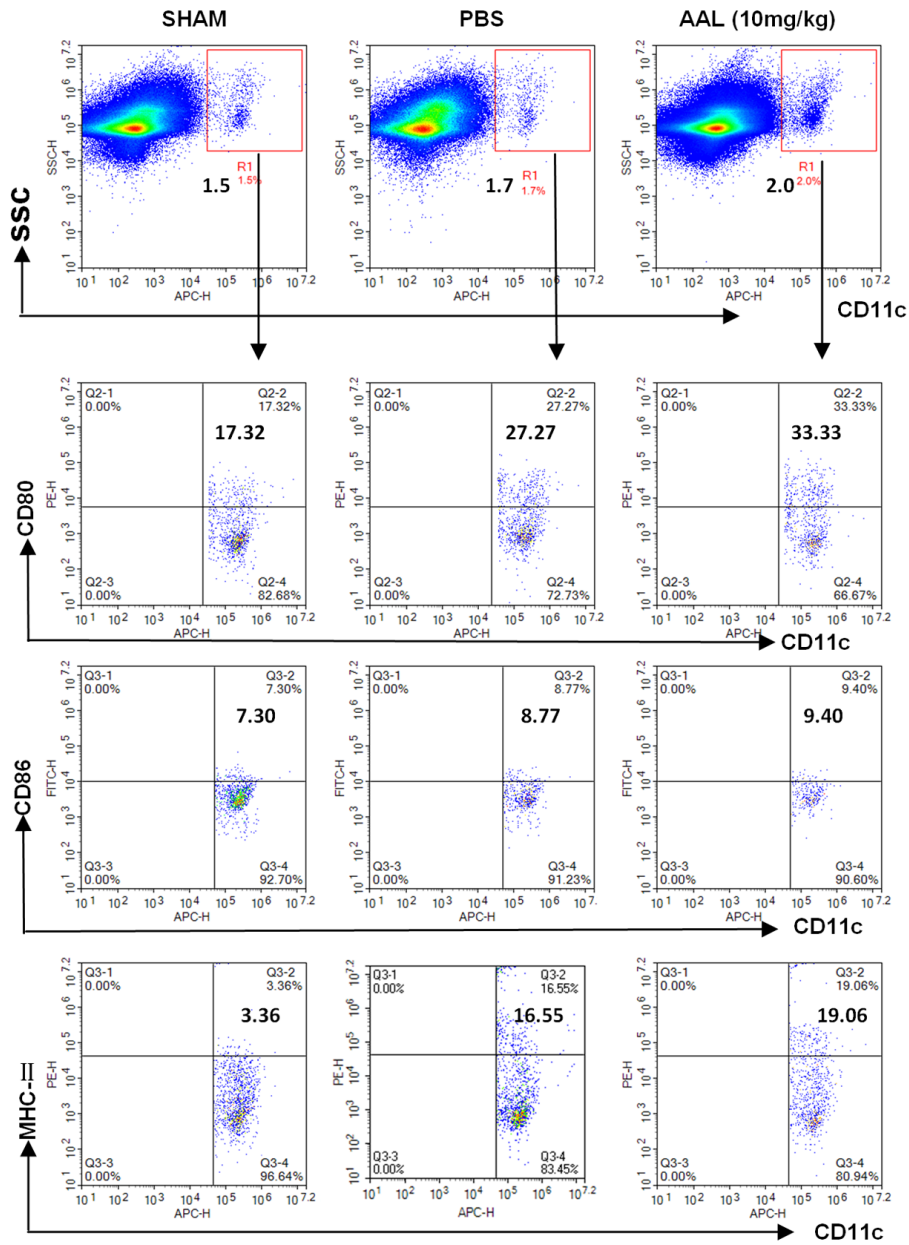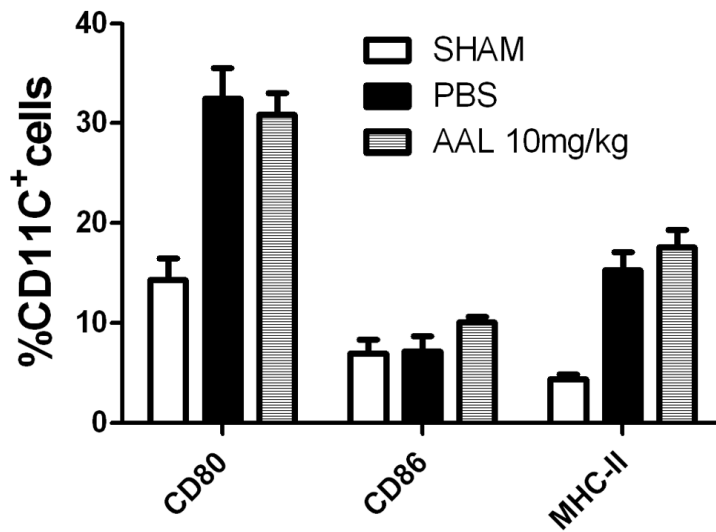

Figure S1. Flow cytometry analysis for the ratio of splenic DCs in three-group mice 48 h after CLP (n = 5 for each group).
